# Supplementary material
Source: MDPI journal article supplement (https://www.mdpi.com/2227-9040/11/12/573)
Supplement: s1 [file s1 › chemosensors-2685011-supplementary.pdf]

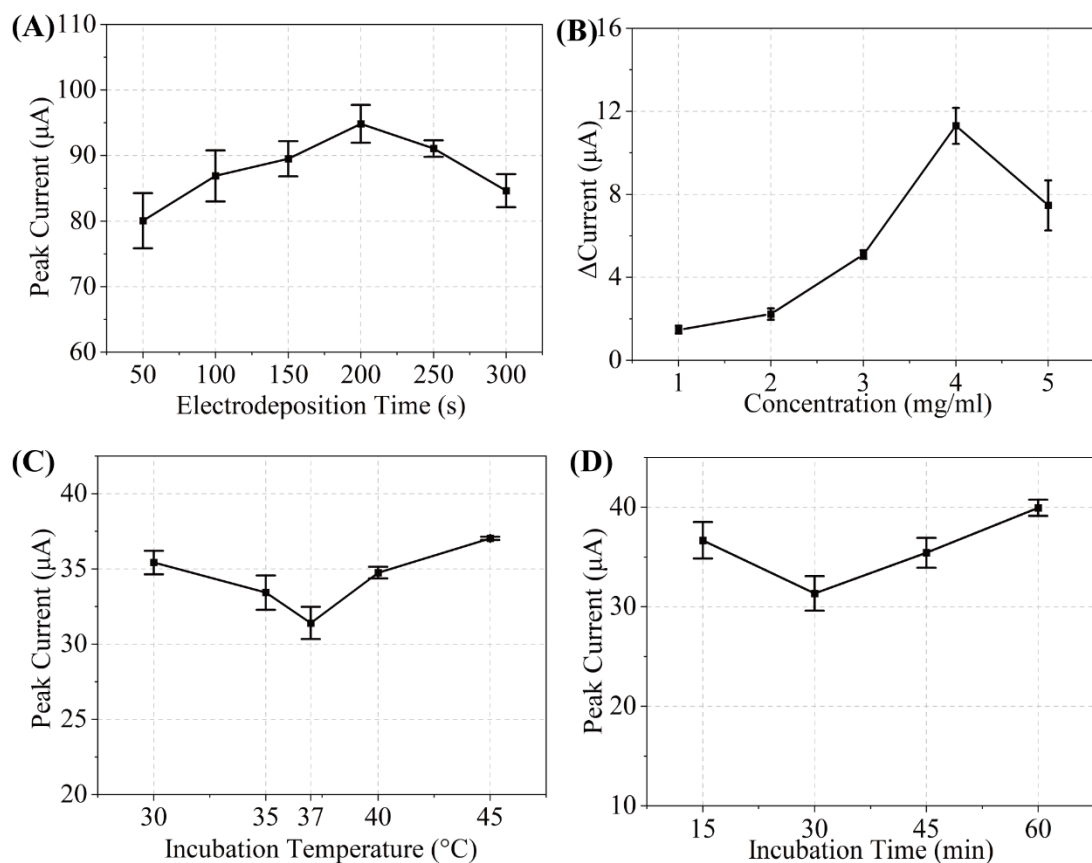

**Figure S1.** The effect of the (A) time of electrodeposition, (B) concentration of PEDOT: PSS/MWCNTs-COOH, (C) incubation temperature, and (D) incubation time on peak currents of the proposed immunosensor.

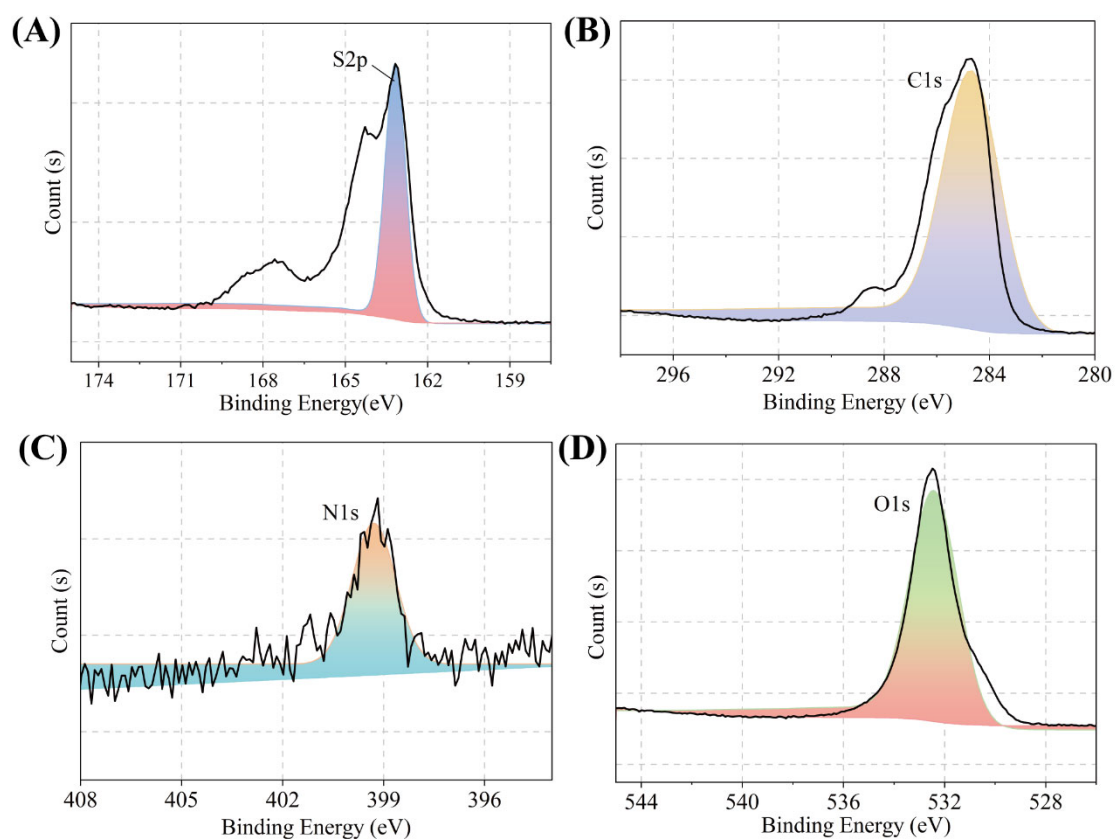

**Figure S2.** Element fitting diagram of XPS of PEDOT: PSS/MWCNTs-COOH (A) S, (B) C, (C) N and (D) O elements.
